# Supplementary material for: Anti-tissue transglutaminase antibodies (TG2A) positivity and the risk of vitamin D deficiency among children - a cross-sectional study in the generation R cohort
Source: Springer Nature journal article supplement (doi:10.1186/s12887-023-04041-x), 2023-06-07
Supplement: MOESM1 [file 25459916]

Supplemental material for the manuscript entitled

*'Anti-tissue transglutaminase antibodies (TG2A) positivity and the risk of vitamin D deficiency among children - A cross-sectional study in the Generation R cohort'*

**Supplementary Table 1.** Characteristics of the children and their mothers, for the total population and split by TG2A positivity (observed data)

|                                                                      | TG2A positivity at 6 years of age |                                             |                                           | p-value <sup>a</sup> |
|----------------------------------------------------------------------|-----------------------------------|---------------------------------------------|-------------------------------------------|----------------------|
|                                                                      | Total population<br>(n=3994)      | TG2A negative<br>(TG2A <7 U/ml)<br>(n=3940) | TG2A positive<br>(TG2A >7 U/ml)<br>(n=54) |                      |
| <b>Child characteristics<sup>b</sup></b>                             |                                   |                                             |                                           |                      |
| Birth weight (grams; mean, SD)                                       | 3434 (551.7)                      | 3433.1 (551.0)                              | 3493.7 (604.6)                            | 0.42                 |
| Female gender (n,%)                                                  | 1934 (48.4)                       | 1899 (48.2)                                 | 35 (64.8)                                 | <b>0.01</b>          |
| Ethnicity (n,%)                                                      |                                   |                                             |                                           |                      |
| Non-Western                                                          | 1312 (33.7)                       | 1300 (33.9)                                 | 12 (22.6)                                 | 0.09                 |
| Western                                                              | 2578 (66.3)                       | 2537 (66.1)                                 | 41 (77.4)                                 |                      |
| Breastfeeding (n,%)                                                  |                                   |                                             |                                           |                      |
| Exclusively breastfed in the first 4 months                          | 656 (25.8)                        | 645 (25.7)                                  | 11 (30.6)                                 | 0.15                 |
| Partially breastfed in the first 4 months                            | 1650 (64.9)                       | 1625 (64.8)                                 | 25 (69.4)                                 |                      |
| Never breastfed                                                      | 237 (9.3)                         | 237 (9.5)                                   | 0 (0.0)                                   |                      |
| Gluten introduction >6 months (n,%)                                  | 1498 (56.1)                       | 1479 (56.2)                                 | 19 (51.4)                                 | 0.55                 |
| Diet score (standardized to 1200 kcal/d; mean, SD)                   | 4.2 (1.3)                         | 4.2 (1.3)                                   | 4.0 (1.3)                                 | 0.48                 |
| Vitamin D supplementation (n,%)                                      | 1131 (45.0)                       | 1113 (44.9)                                 | 18 (50.0)                                 | 0.54                 |
| Gastroenteritis past year (n, %)                                     | 1375 (40.0)                       | 1352 (39.9)                                 | 23 (47.9)                                 | 0.26                 |
| BMI child at 6 years of age (kg/m <sup>2</sup> ; median, IQR)        | 15.8 (15.1-16.9)                  | 15.9 (15.1-16.9)                            | 15.4 (14.7-16.3)                          | <b>0.01</b>          |
| Playing outside at 6 years of age (hours/day; median, IQR)           | 1.3 (0.8-2.1)                     | 1.3 (0.8-2.1)                               | 1.3 (0.7-2.1)                             | 0.70                 |
| 25(OH)D serum concentrations at birth (nmol/L; median, IQR)          | 28.9 (15.2-46.6)                  | 28.9 (15.2-46.6)                            | 33.6 (13.7-45.9)                          | 0.84                 |
| Season of blood draw at 6 years of age (n,%)                         |                                   |                                             |                                           |                      |
| Winter/Spring                                                        | 1989 (49.8)                       | 1956 (49.6)                                 | 33 (61.1)                                 | 0.09                 |
| Summer/Fall                                                          | 2005 (50.2)                       | 1984 (49.7)                                 | 21 (38.9)                                 |                      |
| 25(OH)D serum concentrations at 6 years of age (nmol/L; median, IQR) | 63.9 (45.1-81.0)                  | 63.9 (45.1-81.0)                            | 62.0 (44.9-82.7)                          | 0.80                 |
| 25(OH)D status at 6 years of age (n,%)                               |                                   |                                             |                                           |                      |
| Deficient (<50 nmol/l)                                               | 1199 (30.0)                       | 1182 (30.0)                                 | 17 (31.5)                                 | 0.35                 |
| Sufficient (≥50 to <75 nmol/L)                                       | 1463 (36.6)                       | 1448 (36.8)                                 | 15 (27.8)                                 |                      |
| Optimal (≥75 nmol/L)                                                 | 1332 (33.4)                       | 1310 (33.2)                                 | 22 (40.7)                                 |                      |
| Risk allele frequencies vitamin D deficiency variants                |                                   |                                             |                                           |                      |
| CYP2R1 - GG (n,%)                                                    | 1080 (40.9)                       | 1066 (41.0)                                 | 14 (35.9)                                 | 0.66                 |
| DHCR7 - GG (n,%)                                                     | 460 (11.5)                        | 455 (17.5)                                  | 5 (12.8)                                  | 0.12                 |
| GC - TT (n,%)                                                        | 1459 (36.5)                       | 1441 (55.4)                                 | 18 (46.2)                                 | 0.51                 |
| CYP24A1 - TT (n,%)                                                   | 1538 (38.5)                       | 1516 (58.2)                                 | 22 (56.4)                                 | 0.59                 |
| HLA DQ2 and/ or DQ8 presence (n,%)                                   | 1105 (41.8)                       | 1070 (41.1)                                 | 35 (89.7)                                 | <b>&lt;0.001</b>     |

| <b>Maternal characteristics<sup>b</sup></b>                                            |                  |                  |                  |      |
|----------------------------------------------------------------------------------------|------------------|------------------|------------------|------|
| Maternal educational level (n,%)                                                       |                  |                  |                  |      |
| Low(≤secondary education)                                                              | 1893 (52.2)      | 1874 (52.3)      | 19 (41.3)        | 0.14 |
| High (≥higher education)                                                               | 1736 (47.8)      | 1709 (47.7)      | 27 (58.7)        |      |
| Maternal smoking during pregnancy (n,%)                                                | 551 (15.9)       | 545 (15.9)       | 6 (15.0)         | 0.87 |
| Maternal 25(OH)D serum concentrations second trimester pregnancy (nmol/L; median, IQR) | 50.3 (27.3-76.0) | 50.3 (27.3-76.1) | 51.8 (25.0-75.5) | 0.82 |

Values are frequencies (percentages), means (standard deviations (SD)) or medians (interquartile range (IQR)) from the observed dataset

<sup>a</sup> p-values are calculated with the Chi-square test for categorical variables, Mann-Whitney U test for non-normally distributed variables and Student's T test for continuous normal distributed variables and reflect differences between TG2A positive and negative groups. Fisher's exact test was obtained in case the expected count was less than five. A p-value <0.05 was considered significant.

<sup>b</sup> Data was missing for birth weight (0.2%), ethnicity (2.6%), breastfeeding (36.3%), gluten introduction (33.2%), diet score (53.7%), vitamin D supplementation (37.0%), gastroenteritis past year (13.9%), BMI child at 6-year visit (0.2%), playing outside at 6 y (28.3%), 25(OH)D serum concentrations at birth (45.5%), genes associated with vitamin D deficiency (33.9%), HLA DQ2/DQ8 presence (33.8%), maternal smoking during pregnancy (13.4%), maternal 25(OH)D serum concentrations second trimester pregnancy (23.9%)

**Supplementary Table 2.** Associations between TG2A positivity (binary independent variable) and serum 25(OH)D concentrations (continuous dependent variable) at 6 years of age (crude data)

| TG2A concentrations U/ml       | 25 (OH) D concentrations (nmol/L) |                              |                              |
|--------------------------------|-----------------------------------|------------------------------|------------------------------|
|                                | Crude model<br>$\beta$ (95% CI)   | Model 1<br>$a\beta$ (95% CI) | Model 2<br>$a\beta$ (95% CI) |
| <b>TG2A negative</b><br>n=3940 | <i>Reference</i>                  | <i>Reference</i>             | <i>Reference</i>             |
| <b>TG2A positive</b><br>n=54   | -2.20 (-9.73;5.33)                | -2.50 (-9.05;4.06)           | -3.09 (-12.20;6.02)          |

Values ( $\beta$ 's) are based on linear regression models and reflect between group differences in serum 25 (OH) D concentrations (nmol/L) at 6 years of age relative to the reference group.

\*Denotes statistical significance (P <0.05)

Model 1 was adjusted for season of blood draw (winter/spring and summer/autumn) and ethnicity (Western and non-Western). Model 2 was adjusted for season of blood draw, ethnicity, 25 (OH) D concentrations mother during pregnancy (nmol/L), birth weight (grams), gender, and breastfeeding exclusiveness (yes/no).

Abbreviations:  $\beta$ , beta;  $a\beta$ , adjusted beta; CI, confidence interval.

**Supplementary Table 3.** Associations between TG2A positivity (binary independent variable) and serum 25(OH)D concentrations (continuous dependent variable) at 6 years of age (imputed data)

| 25 (OH) D concentrations (nmol/L)                                             |                                 |                              |                              |                              |                              |                              |                              |                              |
|-------------------------------------------------------------------------------|---------------------------------|------------------------------|------------------------------|------------------------------|------------------------------|------------------------------|------------------------------|------------------------------|
| TG2A concentrations U/ml                                                      | Crude model<br>$\beta$ (95% CI) | Model 1<br>$a\beta$ (95% CI) | Model 2<br>$a\beta$ (95% CI) | Model 3<br>$a\beta$ (95% CI) | Model 4<br>$a\beta$ (95% CI) | Model 5<br>$a\beta$ (95% CI) | Model 6<br>$a\beta$ (95% CI) | Model 7<br>$a\beta$ (95% CI) |
| <b>TG2A negative</b><br><i>n</i> =3940                                        | <i>Reference</i>                | <i>Reference</i>             | <i>Reference</i>             | <i>Reference</i>             | <i>Reference</i>             | <i>Reference</i>             | <i>Reference</i>             | <i>Reference</i>             |
| <b>TG2A positive</b><br><i>n</i> =54                                          | -2.20<br>(-9.72;5.33)           | 0.08<br>(-6.97;7.12)         | -2.20<br>(-8.73;4.33)        | 0.06<br>(-6.92;7.04)         | -0.10<br>(-3.69;3.49)        | -0.13<br>(-7.12;6.92)        | 0.26<br>(-6.78;7.30)         | -1.73<br>(-8.31;4.85)        |
| 25 (OH) D concentrations (nmol/L)                                             |                                 |                              |                              |                              |                              |                              |                              |                              |
| TG2A concentrations U/ml<br>among HLA DQ2 and/or<br>HLA DQ8 positive children | Crude model<br>$\beta$ (95% CI) | Model 1<br>$a\beta$ (95% CI) | Model 2<br>$a\beta$ (95% CI) | Model 3<br>$a\beta$ (95% CI) | Model 4<br>$a\beta$ (95% CI) | Model 5<br>$a\beta$ (95% CI) | Model 6<br>$a\beta$ (95% CI) | Model 7<br>$a\beta$ (95% CI) |
| <b>TG2A negative</b><br><i>n</i> =1070                                        | <i>Reference</i>                | <i>Reference</i>             | <i>Reference</i>             | <i>Reference</i>             | <i>Reference</i>             | <i>Reference</i>             | <i>Reference</i>             | <i>Reference</i>             |
| <b>TG2A positive</b><br><i>n</i> =35                                          | -1.17<br>(-10.43;8.09)          | 0.31<br>(-8.29;8.91)         | -2.11<br>(-10.14;5.91)       | 0.30<br>(-7.76;8.36)         | 0.87<br>(-7.72;9.46)         | 0.35<br>(-8.29;8.98)         | 0.45<br>(-8.15;9.05)         | -1.19<br>(-9.05;6.66)        |

Values ( $\beta$ 's) are based on linear regression models and reflect between group differences in serum 25 (OH) D concentrations (nmol/L) at 6 years of age relative to the reference group.

Multivariable model 1 was adjusted for season of blood draw (winter/spring versus summer/autumn). Model 2 was adjusted for season of blood draw (winter/spring versus summer/autumn) and ethnicity (Western versus non-Western). Model 3 was adjusted for season of blood draw (winter/spring versus summer/autumn) and 25 (OH) D concentrations of the mother during pregnancy (nmol/L). Model 4 was adjusted for season of blood draw (winter/spring versus summer/autumn) and birth weight (grams). Model 5 was adjusted for season of blood draw (winter/spring versus summer/autumn) and gender. Model 6 was adjusted for season of blood draw (winter/spring versus summer/autumn) and breastfeeding exclusiveness (yes/no). Model 7 was adjusted for all covariates.

Abbreviations:  $\beta$ , beta;  $a\beta$ , adjusted beta; CI, confidence interval.

**Supplementary Table 4.** Associations between TG2A positivity (binary independent variable) and serum 25(OH)D concentrations (continuous dependent variable) at 6 years of age (crude data)

|                                |                                 | 25 (OH) D concentrations (nmol/L) |                              |                              |                              |                              |                              |                              |
|--------------------------------|---------------------------------|-----------------------------------|------------------------------|------------------------------|------------------------------|------------------------------|------------------------------|------------------------------|
| TG2A concentrations U/ml       | Crude model<br>$\beta$ (95% CI) | Model 1<br>$a\beta$ (95% CI)      | Model 2<br>$a\beta$ (95% CI) | Model 3<br>$a\beta$ (95% CI) | Model 4<br>$a\beta$ (95% CI) | Model 5<br>$a\beta$ (95% CI) | Model 6<br>$a\beta$ (95% CI) | Model 7<br>$a\beta$ (95% CI) |
| <b>TG2A negative</b><br>n=3940 | <i>Reference</i>                | <i>Reference</i>                  | <i>Reference</i>             | <i>Reference</i>             | <i>Reference</i>             | <i>Reference</i>             | <i>Reference</i>             | <i>Reference</i>             |
| <b>TG2A positive</b><br>n=54   | -2.20<br>(-9.72;5.33)           | 0.08<br>(-6.97;7.12)              | -2.50<br>(-9.05;4.06)        | 0.52<br>(-7.24;8.28)         | -0.10<br>(-7.13;6.94)        | -0.13<br>(-7.18;6.92)        | -1.12<br>(-9.61;7.37)        | -3.09<br>(-12.20;6.02)       |

Values ( $\beta$ 's) are based on linear regression models and reflect between group differences in serum 25 (OH) D concentrations (nmol/L) at 6 years of age relative to the reference group.

Multivariable model 1 was adjusted for season of blood draw (winter/spring versus summer/autumn). Model 2 was adjusted for season of blood draw (winter/spring versus summer/autumn) and ethnicity (Western versus non-Western). Model 3 was adjusted for season of blood draw (winter/spring versus summer/autumn) and 25 (OH) D concentrations mother during pregnancy (nmol/L). Model 4 was adjusted for season of blood draw (winter/spring versus summer/autumn) and birth weight (grams). Model 5 was adjusted for season of blood draw (winter/spring versus summer/autumn) and gender. Model 6 was adjusted for season of blood draw (winter/spring versus summer/autumn) and breastfeeding exclusiveness (yes/no). Model 7 was adjusted for all covariates.

Abbreviations:  $\beta$ , beta;  $a\beta$ , adjusted beta; CI, confidence interval.

**Supplementary Table 5a.** Associations between TG2A positivity (binary independent variable) and serum 25(OH)D concentrations (continuous dependent variable) at 6 years of age, selected by mean diet quality score <4.17 (imputed data)

| TG2A concentrations U/ml             | 25 (OH) D concentrations (nmol/L) |                              |                              |
|--------------------------------------|-----------------------------------|------------------------------|------------------------------|
|                                      | Crude model<br>$\beta$ (95% CI)   | Model 1<br>$a\beta$ (95% CI) | Model 2<br>$a\beta$ (95% CI) |
| <b>TG2A negative</b><br><i>n=925</i> | <i>Reference</i>                  | <i>Reference</i>             | <i>Reference</i>             |
| <b>TG2A positive</b><br><i>n=14</i>  | -7.84 (-23.07;7.38)               | -5.14 (-19.41;9.14)          | -3.75 (-17.13;9.63)          |

Values ( $\beta$ 's) are based on linear regression models and reflect between group differences in serum 25 (OH) D concentrations (nmol/L) at 6 years of age relative to the reference group.

Multivariable model 1 was adjusted for season of blood draw and ethnicity (Western versus non-Western). The main model was adjusted for season of blood draw (winter/spring versus summer/autumn), 25 (OH) D concentrations mother during pregnancy (nmol/L), birth weight (grams), gender, ethnicity (Western versus non-Western) and breastfeeding exclusiveness (yes/no).

Abbreviations:  $\beta$ , beta;  $a\beta$ , adjusted beta; CI, confidence interval.

**Supplementary Table 5b.** Associations between TG2A positivity (binary independent variable) and serum 25(OH)D concentrations (continuous dependent variable) at age 6 years, selected by mean diet quality score  $\geq 4.17$  (imputed data)

| TG2A concentrations U/ml             | 25 (OH) D concentrations (nmol/L) |                              |                              |
|--------------------------------------|-----------------------------------|------------------------------|------------------------------|
|                                      | Crude model<br>$\beta$ (95% CI)   | Model 1<br>$a\beta$ (95% CI) | Model 2<br>$a\beta$ (95% CI) |
| <b>TG2A negative</b><br><i>n=899</i> | <i>Reference</i>                  | <i>Reference</i>             | <i>Reference</i>             |
| <b>TG2A positive</b><br><i>n=10</i>  | 9.09 (-7.70;25.88)                | 8.42 (-6.86;23.70)           | 8.06 (-7.20;23.32)           |

Values ( $\beta$ 's) are based on linear regression models and reflect between group differences in serum 25 (OH) D concentrations (nmol/L) at 6 years of age relative to the reference group.

Multivariable model 1 was adjusted for season of blood draw and ethnicity (Western versus non-Western). The main model was adjusted for season of blood draw (winter/spring versus summer/autumn), 25 (OH) D concentrations mother during pregnancy (nmol/L), birth weight (grams), gender, ethnicity (Western versus non-Western) and breastfeeding exclusiveness (yes/no).

Abbreviations:  $\beta$ , beta;  $a\beta$ , adjusted beta; CI, confidence interval.



**Supplementary Table 6.** Associations between TG2A positivity (binary independent variable) and serum 25(OH)D concentrations (continuous dependent variable) at age 6 years, tested for effect modification by risk allele variants for vitamin D deficiency (n=3994)(crude data)

| 25 (OH) D concentrations (nmol/L)     |                                    |                                    |                                    |                                    |
|---------------------------------------|------------------------------------|------------------------------------|------------------------------------|------------------------------------|
| TG2A concentrations U/ml              | Model 1<br>p-value for interaction | Model 2<br>p-value for interaction | Model 3<br>p-value for interaction | Model 4<br>p-value for interaction |
| <b>TG2A negative</b><br><i>n=3940</i> | 0.33                               | 0.68                               | 0.62                               | 0.25                               |

\*A p-value <0.05 was considered significant.

Model 1 shows possible interaction between rs2282679 and TG2A concentrations. Model 2 shows possible interaction between rs6013897 and TG2A concentrations. Model 3 shows possible interaction between rs10741657 and TG2A concentrations. Model 4 shows possible interaction between rs12785878 and TG2A concentrations.
